# Supplementary material for: Hemoglobin immobilized within mesoporous TiO2–SiO2 material with high loading and enhanced catalytic activity
Source: Royal Society of Chemistry journal article supplement (doi:10.1039/c1nj20711c), 2011-01-01
Supplement: c1nj20711c.pdf [file c1nj20711c.pdf]

# Hemoglobin immobilized within mesoporous TiO<sub>2</sub>-SiO<sub>2</sub> material with high loading and enhanced catalytic activity

Leilei Luo,<sup>a, b</sup> Fei Kong<sup>a, b</sup>, Sheng Chu<sup>a, b</sup>, Yijun Liu<sup>a, b</sup>, Haoyue Zhu<sup>c</sup>  
Ying Wang<sup>a, b\*</sup> and Zhigang Zou<sup>a</sup>

<sup>a</sup> Eco-materials and renewable Energy Research Center (ERERC), National Laboratory of Solid state Microstructure, Nanjing University, Nanjing, 210093, People's Republic of China, Fax: +86-25-83686632; Tel: +86-25-83621219; E-mail: wangy@nju.edu.cn

<sup>b</sup> School of Chemistry and Chemical Engineering, Nanjing University, Nanjing, 210093, People's Republic of China

<sup>c</sup> College of Letters and Science, University of Wisconsin Madison, Madison WI 53715 (USA).

## Supplementary Information

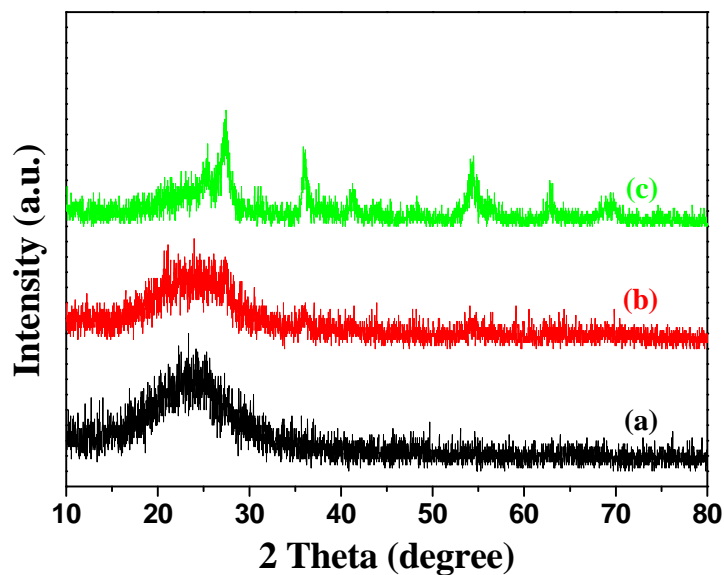

Fig.S1 Wide angle X-ray diffraction patterns of (a) 20TiO<sub>2</sub>-SiO<sub>2</sub>, (b) 40TiO<sub>2</sub>-SiO<sub>2</sub> and (c) 60TiO<sub>2</sub>-SiO<sub>2</sub>

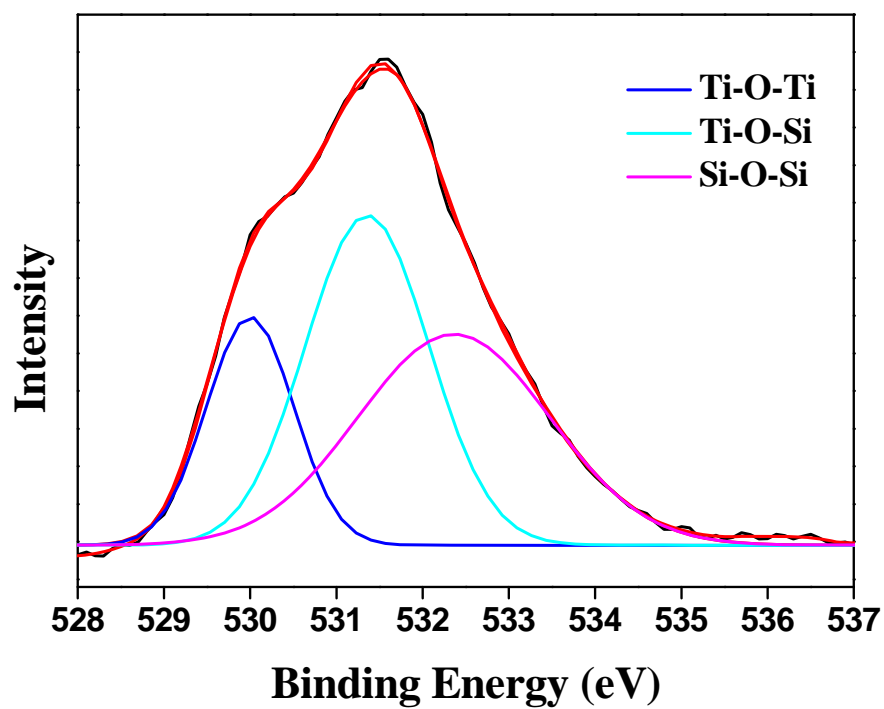

Fig.S2 X-ray photoelectron spectrum (XPS) of 20TiO<sub>2</sub>-SiO<sub>2</sub>

Table. S1 The Zeta potential of  $\text{SiO}_2$  and  $x\text{TiO}_2\text{-SiO}_2$  suspensions in pH  
5.4 PBS

| Sample                        | Zeta potential (mV) |
|-------------------------------|---------------------|
| $10\text{SiO}_2$              | -17.04              |
| $20\text{TiO}_2\text{-SiO}_2$ | -18.76              |
| $40\text{TiO}_2\text{-SiO}_2$ | -20.57              |
| $60\text{TiO}_2\text{-SiO}_2$ | -28.02              |

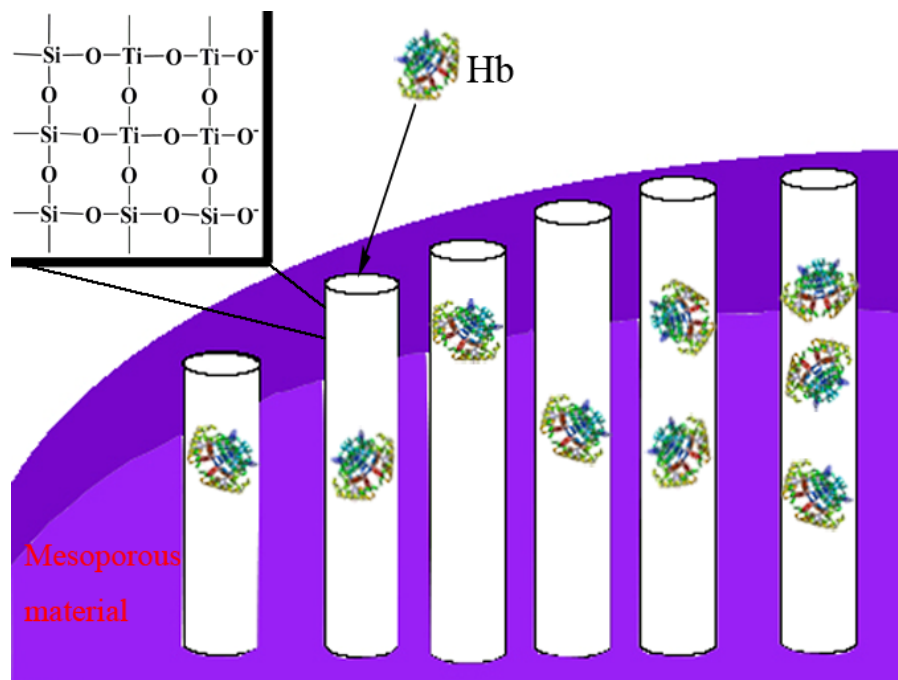

Fig.S3 Schematic illustration of encapsulation of Hb from pH 5.4 PBS into the pore of  $\text{TiO}_2\text{-SiO}_2$ . The wall of  $\text{TiO}_2\text{-SiO}_2$  mesoporous material consists of Ti and Si which connect with each other by Ti-O-Si bond. As the pore size is larger than the Hb dimension, Hb can be adsorbed within the pore smoothly.

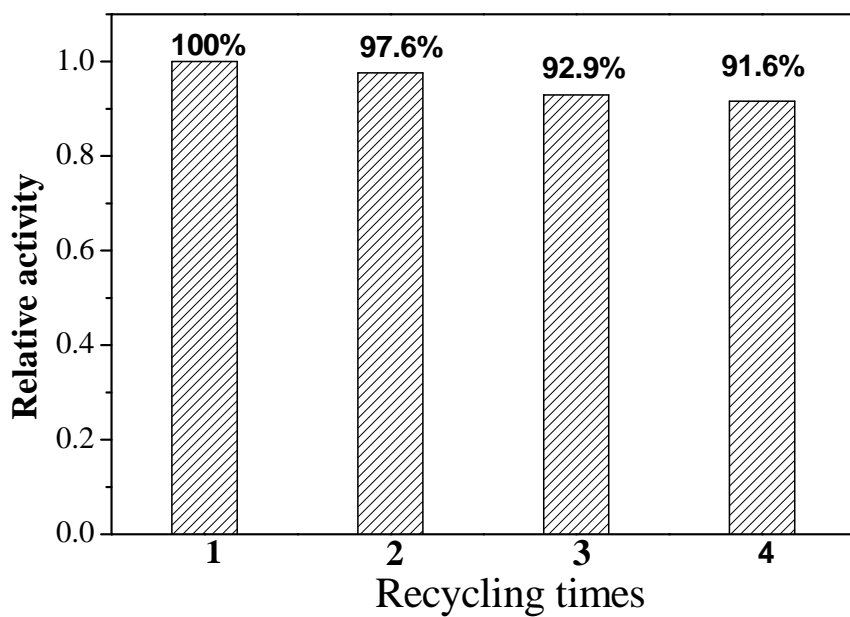

Fig.S4 Relative activity of 40% TiO<sub>2</sub>-SiO<sub>2</sub>-Hb in four times usage; the reaction possesses 0.0025M BPO and 0.001M OPD catalyzed by 0.01g

40% TiO<sub>2</sub>-SiO<sub>2</sub>-Hb in CHCl<sub>3</sub>.
